# Supplementary material for: Visible Light–Near-Infrared Photodetection on Cys-MoO3−x Nanoparticles for Photothermal Therapy against Papillary Thyroid Carcinoma
Source: MDPI journal article supplement (doi:10.3390/coatings13091552), 2023-09-05
Supplement: s1 [file s1]

# Visible Light–Near-Infrared Photodetection on Cys-MoO<sub>3-x</sub> Nanoparticles for Photothermal Therapy against Papillary Thyroid Carcinoma

Jinhuan Chen <sup>1,2</sup>, Xian Liu <sup>1</sup>, Xin Zeng <sup>2</sup>, Ming Yang <sup>3,\*</sup> and Liang Xie <sup>2,\*</sup>

<sup>1</sup> Emergency Department, West China Hospital of Stomatology, Sichuan University, Chengdu 610041, China; chenjinhuan32@scu.edu.cn (J.C.)

<sup>2</sup> State Key Laboratory of Oral Diseases, National Center for Stomatology, National Clinical Research Center for Oral Diseases, Research Unit of Oral Carcinogenesis and Management, Chinese Academy of Medical Sciences, West China Hospital of Stomatology, Sichuan University, Chengdu 610041, China

<sup>3</sup> Institute of Electronic and Electrical Engineering, Civil Aviation Flight University of China, No. 46 Section 4, Nanchang Road, Guanghan 618307, China

\* Correspondence: yangming932@cafuc.edu.cn (M.Y.); lxie@scu.edu.cn (L.X.)

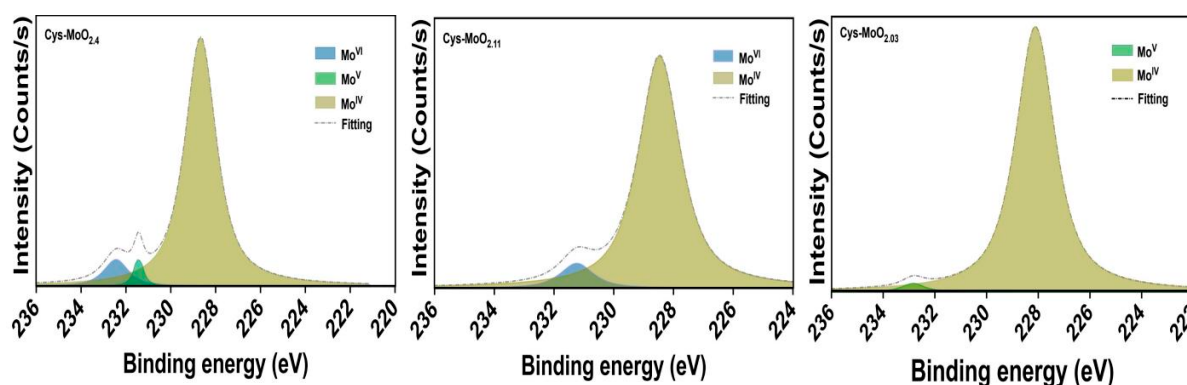

**Figure S1.** Typical XPS measurements of Cys-MoO<sub>3-x</sub> of the blue sample respectively 10 mg, 20 mg and 40 mg cysteine, the actual solutions of NPs mixture are Cys-MoO<sub>2.4</sub>, Cys-MoO<sub>2.11</sub> and Cys-MoO<sub>2.03</sub>

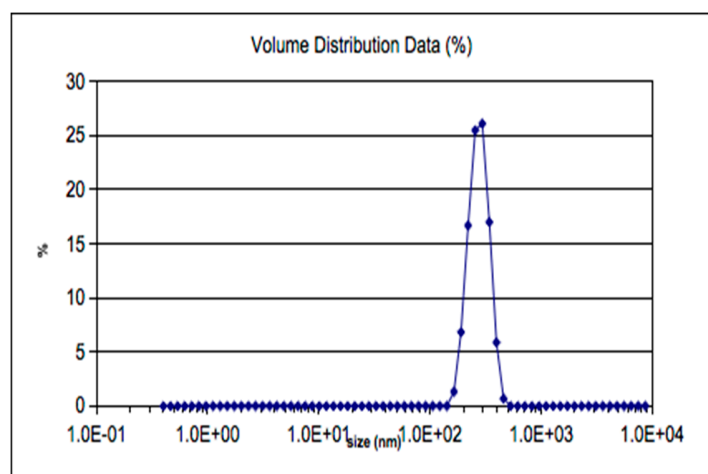

**Figure S2.** Hydrodynamic diameters of MoO<sub>3</sub> solution without cysteine reduction, the smallest is 268.9 nm.

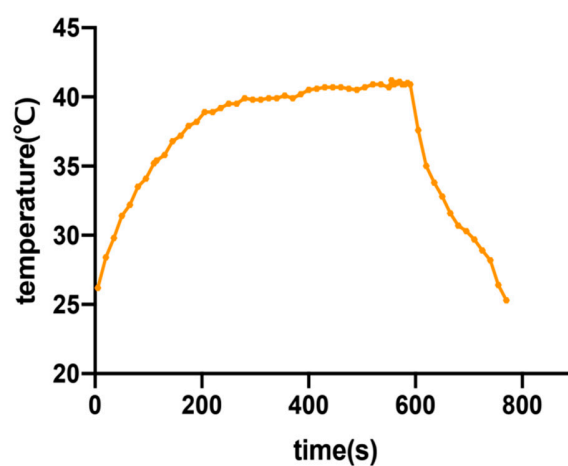

**Figure S3.** Temperature versus time curves of Cys-MoO<sub>2</sub> under 808 nm radiation and its relaxation behaviors after turning off the laser on 600 (s) point.

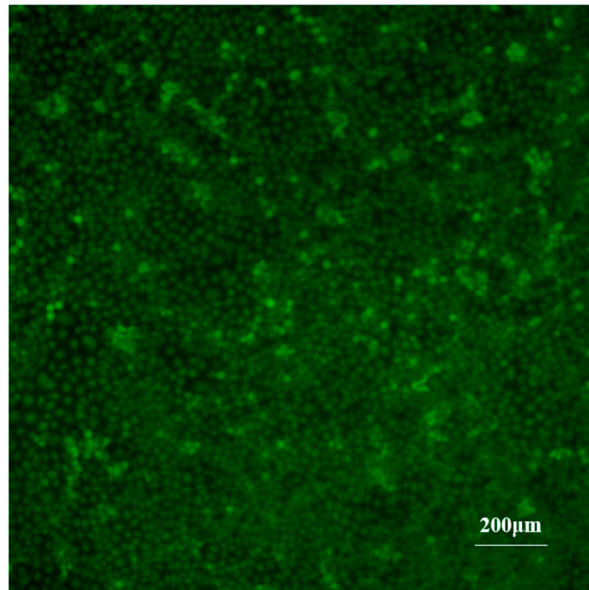

**Figure S4.** Cell cultured with original medium but no NPs medicine and laser irradiation.
